# Supplementary material for: Delivery Mode Affects Stability of Early Infant Gut Microbiota
Source: PubMed Central journal article supplement — Cell Rep Med. 2020 Dec 22;1(9):100156. doi: 10.1016/j.xcrm.2020.100156 (PMC7762768; doi:10.1016/j.xcrm.2020.100156), 2020-12-22
Supplement: mmc3.pdf [file mmc3.pdf]

# Delivery Mode Affects Stability of Early Infant Gut Microbiota

## Graphical Abstract

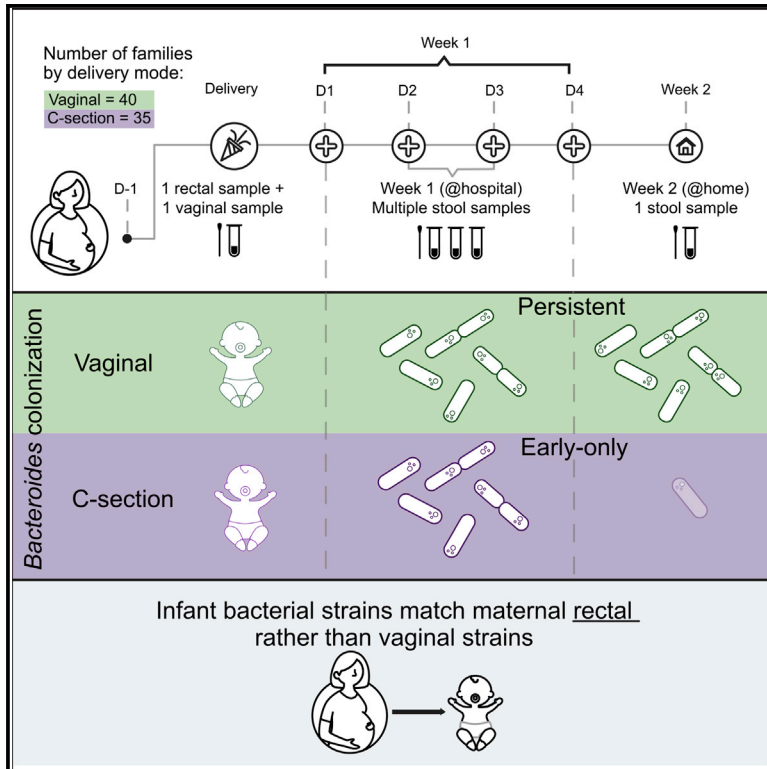

## Authors

Caroline M. Mitchell, Chiara Mazzoni, Larson Hogstrom, ..., Hera Vlamakis, Ramnik J. Xavier, Moran Yassour

## Correspondence

moranya@mail.huji.ac.il

## In Brief

Mitchell et al. compare early-life infant gut microbiota by delivery mode, suggesting early colonization by *Bacteroides* regardless of delivery mode, but loss of *Bacteroides* by 2 weeks in C-section-delivered infants, whether or not exposed to the vagina in labor. Infant strains matched maternal rectal rather than vaginal strains.

## Highlights

- Week 1 gut microbiota does not differ between infants born vaginally versus C-section
- Week 2 gut microbiota of C-section infants lacks *Bacteroides*
- Microbiota of infants born by C-section after labor resembles scheduled C-section
- Bacterial strains in infants match maternal rectal rather than vaginal strains

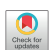

## Article

# Delivery Mode Affects Stability of Early Infant Gut Microbiota

Caroline M. Mitchell,<sup>1</sup> Chiara Mazzoni,<sup>2</sup> Larson Hogstrom,<sup>3</sup> Allison Bryant,<sup>1</sup> Agnes Bergerat,<sup>1</sup> Avital Cher,<sup>2</sup> Shawna Pochan,<sup>1</sup> Penelope Herman,<sup>1</sup> Maureen Carrigan,<sup>1</sup> Karen Sharp,<sup>1</sup> Curtis Huttenhower,<sup>3,4</sup> Eric S. Lander,<sup>3,5,6</sup> Hera Vlamakis,<sup>3,7</sup> Ramnik J. Xavier,<sup>3,7,8</sup> and Moran Yassour<sup>2,3,9,10,\*</sup>

<sup>1</sup>Vincent Obstetrics & Gynecology Department, Massachusetts General Hospital, Boston, MA 02114, USA

<sup>2</sup>Faculty of Medicine, The Hebrew University of Jerusalem, Jerusalem 91121, Israel

<sup>3</sup>Broad Institute of MIT and Harvard, Cambridge, MA 02142, USA

<sup>4</sup>Department of Biostatistics, Harvard T.H. Chan School of Public Health, Boston, MA 02115, USA

<sup>5</sup>Department of Biology, Massachusetts Institute of Technology, Cambridge, MA 02139, USA

<sup>6</sup>Department of Systems Biology, Harvard Medical School, Boston, MA 02125, USA

<sup>7</sup>Center for Microbiome Informatics and Therapeutics, Massachusetts Institute of Technology, Cambridge, MA 02139, USA

<sup>8</sup>Gastrointestinal Unit, Center for the Study of Inflammatory Bowel Disease, Massachusetts General Hospital and Harvard Medical School, Boston, MA 02114, USA

<sup>9</sup>The Rachel and Selim Benin School of Computer Science and Engineering, The Hebrew University of Jerusalem, Jerusalem 91904, Israel

<sup>10</sup>Lead Contact

\*Correspondence: [moranya@mail.huji.ac.il](mailto:moranya@mail.huji.ac.il)  
<https://doi.org/10.1016/j.xcrm.2020.100156>

## SUMMARY

Mode of delivery strongly influences the early infant gut microbiome. Children born by cesarean section (C-section) lack *Bacteroides* species until 6–18 months of age. One hypothesis is that these differences stem from lack of exposure to the maternal vaginal microbiome. Here, we re-evaluate this hypothesis by comparing the microbial profiles of 75 infants born vaginally or by planned versus emergent C-section. Multiple children born by C-section have a high abundance of *Bacteroides* in their first few days of life, but at 2 weeks, both C-section groups lack *Bacteroides* (primarily according to 16S sequencing), despite their difference in exposure to the birth canal. Finally, a comparison of microbial strain profiles between infants and maternal vaginal or rectal samples finds evidence for mother-to-child transmission of rectal rather than vaginal strains. These results suggest differences in colonization stability as an important factor in infant gut microbiome composition rather than birth canal exposure.

## INTRODUCTION

Infants begin life with a relatively simple gut microbial community and acquire a more complex, adult-like microbiome over the first 3 years of life.<sup>1–4</sup> While multiple factors influence composition and dynamics during the first year of life, delivery mode is one of the most significant.<sup>5,6</sup> Infants born by cesarean section (C-section, CS) have significantly different early gut microbial features compared to vaginally delivered infants, including lower diversity and richness<sup>2,7</sup> and lower prevalence of colonization with *Bacteroides* species.<sup>1,5–12</sup> This CS microbial signature is detectable to at least 6 months of age, despite subsequent effects of breastfeeding on the infant microbiome.<sup>1,4,5</sup>

Pioneering studies demonstrated the difference in early microbiome development between delivery modes, but did not identify the underlying causes of this difference.<sup>13</sup> It is widely believed that the infant gut is seeded with microbes from the mother during labor, particularly from the maternal vaginal microbiome. The data supporting these hypotheses, however, are limited. Prior studies have relied on a single infant stool sample collected around birth,<sup>1,2,8,14–16</sup> examined a small number of 20–30

mother-infant dyads,<sup>7,8,13,17,18</sup> confounded vaginal microbiome exposure by combining pre- and post-labor CS groups (infants born by post-labor CS are exposed to the maternal vaginal microbiome, but eventually extracted by C-section),<sup>2,4,6,8,15</sup> or excluded post-labor CS altogether.<sup>2,4,6,8,15–17</sup>

Infants born by post-labor CS provide a unique opportunity to study the impact of traveling through the birth canal on bacterial transmission from mother to infant. Comparing the microbiomes of infants born by pre- and post-labor CSs will more definitively address the importance of exposure to vaginal microbes independent of mode of exit. Furthermore, studying mother-to-infant microbial transmission requires a comparison of the microbes found in both mothers and infants at the strain-level using deep metagenomic sequencing, as we (and others) have recently reported.<sup>18–21</sup>

Here, we examine the sources and timing of delivery mode-associated microbial signatures. We established a birth cohort to collect multiple newborn and maternal microbiome samples from the first 2 weeks of life. Using 16S and metagenomic sequencing, we compared the gut microbiome of newborns across delivery modes and found that (1) the vaginal delivery

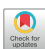

microbial signature is not simply the result of exposure to birth canal microbes, as children born by post-labor CS had a microbial signature resembling those born by pre-labor CS; (2) the lack of *Bacteroides* species in the guts of infants delivered by both pre- and post-labor CSs only appears in the second week of life, as many children had detectable *Bacteroides* in their first week of life that later disappeared; and (3) mother-to-child bacterial transmission events occur mostly in vaginally delivered children, and the maternal source is rectal rather than vaginal.

## RESULTS

To study microbiome acquisition immediately following birth, we collected maternal and newborn samples from 75 families admitted to the Massachusetts General Hospital Labor and Delivery unit. We enrolled 40 children born vaginally, 19 children born by scheduled, pre-labor CS, and 16 children born by non-elective CS following labor. We collected maternal rectal and vaginal samples <24 h before delivery to evaluate potential maternal microbial sources at the time of delivery. In addition, we collected daily stool samples from the newborns while they were at the hospital (days 0–4 of life, 2–4 samples per infant) and 1 stool sample collected at home at 2 weeks of age (median 17 days of life) (see Figure 1A; Tables 1 and S2 for characteristics of the cohort). Neonatal stool samples often have low bacterial biomass, a high proportion of human DNA, and varying sample volumes, which motivated our collection of multiple samples from the first week of life to obtain a more complete picture of initial microbial exposure and colonization. We performed 16S rRNA gene sequencing on infant samples and metagenomic sequencing on both maternal and infant samples.

To determine how delivery mode affects acquisition and persistence of bacterial taxa, we stratified samples into week 1 (multiple time points per infant) and week 2 (days 13–29, 1 sample per infant). Week 1 samples were collected between days 1 and 4 of life, with a median of 3 samples from both vaginally and CS-delivered infants. Due to gut microbiome variability in the first few days of life,<sup>19</sup> we calculated the maximum abundance for each taxon across the multiple week 1 samples from each infant to consider all of the species that were observed in the infant gut in the first week of life. We focused our analyses on the 16S rRNA gene sequencing data due to the increased sensitivity of this method compared to metagenomics in low-microbial biomass samples.<sup>22,23</sup> We compared genus-level gut microbiome profiles across delivery modes using multivariate linear regression.<sup>24</sup> Because breastfeeding rates and exposure to formula differed by delivery mode (Figure 1A), we adjusted for infant feeding in regression analyses comparing delivery groups. Principal-component analysis did not reveal a significant difference using beta diversity across delivery modes (data not shown).

Surprisingly, the well-established absence of *Bacteroides* species in the gut microbiome of most infants born by CS was not evident in the first week of life (Figures 1B and 1C). We found that 33/35 (94%) infants born by pre- or post-labor CS had detectable levels of gut *Bacteroides* species ( $\geq 0.1\%$ ) during their first week of life. Consistent with the literature, we found that at week 2, infants born via CS (both pre- and post-labor) were much less likely to be colonized by *Bacteroides* relative

to infants born vaginally (Figures 1B and 1C). The same analysis using metagenomic data identified *Bacteroides* in fewer samples from CS infants, but demonstrated a similar loss of colonization in the week 2 samples, although this did not reach statistical significance (Figure S1A). Notably, we found no significant differences in taxa between the microbiomes of infants born by pre- and post-labor CSs, suggesting that vaginal exposure may not be a driving force in *Bacteroides* colonization (Figure 1B).

To facilitate additional analyses, we grouped infants who had both week 1 and week 2 samples according to the pattern of *Bacteroides* colonization in weeks 1 and 2. We defined *Bacteroides* colonization as "persistent" if it was detected in weeks 1 and 2 samples, "early-only" if it was detected in week 1 but not week 2, and "absent" if it was not detected in either week 1 or 2. A small number of children (3) had the absent colonization pattern, and no infants in our study were only colonized at week 2. The vast majority of children born by CS (91%) have an early-only colonization pattern of *Bacteroides*, whereas most vaginally delivered children (58%) have the persistent colonization pattern (Figure 1D). To be clear, persistent by our definition refers only to week 2 colonization and does not imply that *Bacteroides* will persist into early life.

We confirmed this *Bacteroides* signature (presence in week 1 followed by loss at week 2 in CS-delivered infants) by re-examining published datasets. We analyzed the raw data from 2 published cohorts that used 16S sequencing,<sup>12,14</sup> and 3 that used shotgun metagenomic sequencing.<sup>11,18,19</sup> We observed the same pattern of early *Bacteroides* colonization and later disappearance in some children delivered by CS (Figure S1B; Table S3); however this difference between weeks 1 and 2 had not been identified or highlighted in the original articles. The early presence of *Bacteroides* species in CS-delivered infants suggests that their later absence cannot be attributed to lack of exposure.<sup>13,25</sup> We also used data from a study by Ferretti et al.,<sup>18</sup> which included several samples from the first week of life, as well as our own data to examine the impact of using maximal abundance from all week 1 samples compared to using data from a single, randomly selected sample. We found that in both cohorts, using maximal abundance was more likely to identify week 1 *Bacteroides* colonization (Figure S1B), suggesting that the additional samples allowed for the increased sensitivity.

We next wondered whether maternal factors other than delivery mode may explain the differential *Bacteroides* colonization patterns. However, we saw no difference across delivery modes in maternal race, body mass index (BMI), or prevalence of medical comorbidities, which suggests that these characteristics were not significant confounders (Table 1). Of note, the median maternal BMI in all three delivery mode groups was in the overweight range. Age was higher in women who underwent scheduled CS, and meconium-stained amniotic fluid was more common in women who labored (whether delivering vaginally or via CS). Finally, all women undergoing CS receive antibiotics before incision, and we wanted to confirm that the differential colonization pattern across delivery modes was not due to the antibiotic treatment. Some of the women who delivered vaginally were also given antibiotics—for example, if they tested positive for group B *Streptococcus* (GBS). To test the hypothesis that

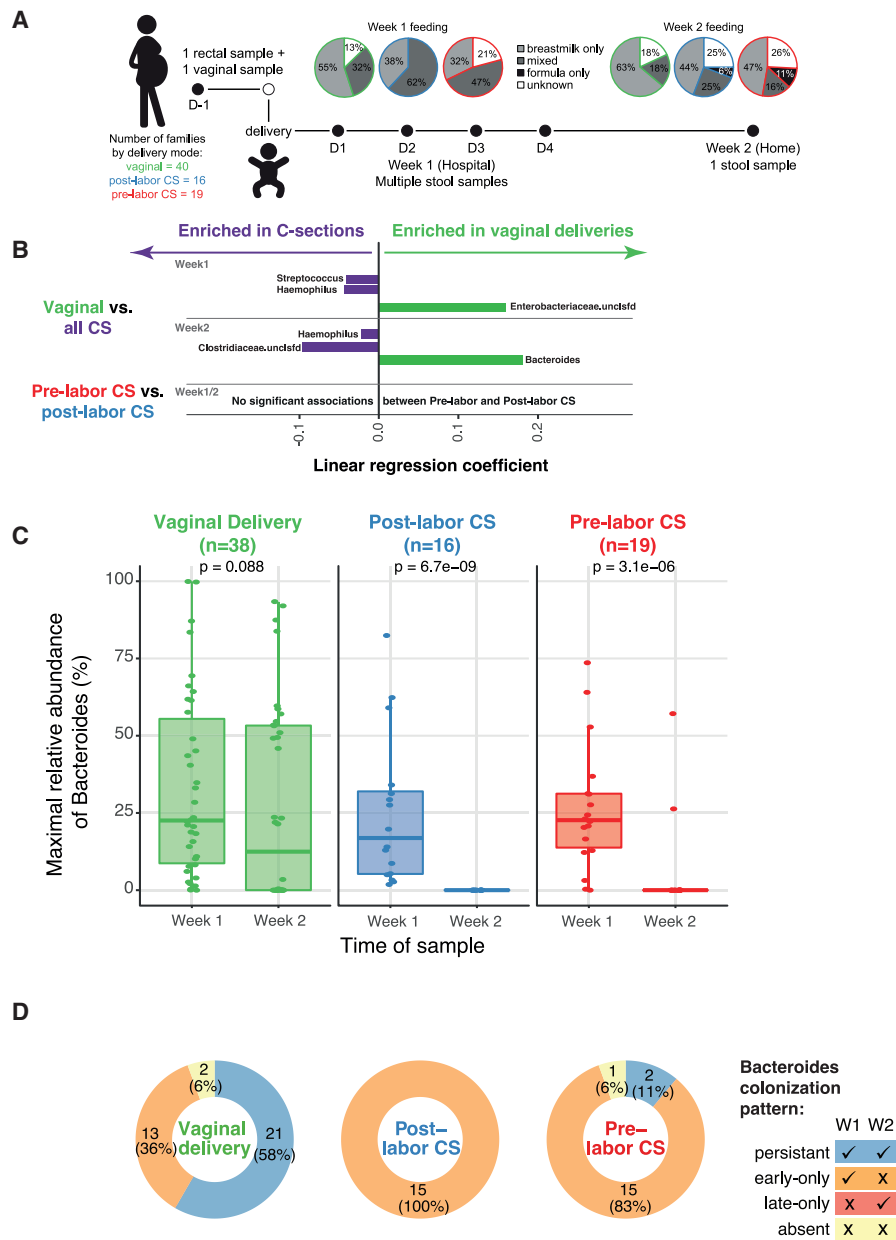

**Figure 1. Cohort Description and Key Differential Taxa across Delivery Modes**

(A) Cohort information about delivery mode, feeding practices, and sampling. Women presenting to Labor and Delivery at term ( $\geq 37$  weeks) with singleton gestation were enrolled and had a rectal and vaginal sample collected before delivery. A stool sample was collected from the infants' diaper daily while in the hospital, and parents sent a single stool sample from home at 2 weeks of life. Feeding practices were abstracted from inpatient charts for week 1 and obtained from parent questionnaires for week 2.

(B) Impact of delivery mode on early life microbial composition. Multivariate linear regression was used to identify taxa that were enriched in vaginally delivered versus C-section-delivered (CS) infants and pre- versus post-labor CS (using the results of 16S rRNA sequencing). Analyses were adjusted for feeding practices in the week of interest. A positive coefficient represents a taxon more abundant in vaginally delivered infants. Only associations with absolute coefficients  $\geq 0.015$ , and FDR corrected q value  $< 0.25$  are included here.

(C) Loss of *Bacteroides* colonization in CS-delivered infants. Maximal abundance of *Bacteroides* in week 1 (i.e., the sample with the highest relative abundance) versus week 2 samples by 16S sequencing was compared within delivery mode using the t test.

(D) Differences in patterns of *Bacteroides* colonization by delivery mode. The *Bacteroides* colonization phenotype was assigned based on detection at  $\geq 0.1\%$  in week 1 samples only (early-only), week 2 only (late-only), both week 1 and week 2 (persistent), or neither (absent). Results are presented for the 67 infants with samples available from both time points.

**Table 1. Clinical Data Summary for the 75 Dyads in the Cohort**

|                                              | Vaginal<br>n = 40 | Post-labor<br>n = 16 | Pre-labor<br>n = 19 | p <sup>a</sup> |
|----------------------------------------------|-------------------|----------------------|---------------------|----------------|
| Age, y                                       | 33 ± 5            | 31 ± 5               | 38 ± 4              | <0.001         |
| White race (%)                               | 31 (78)           | 11 (69)              | 18 (95)             | 0.19           |
| BMI                                          | 28 ± 7            | 28 ± 5               | 28 ± 6              | 0.98           |
| Gestational diabetes (%)                     | 0 (0)             | 1 (6)                | 1 (6)               | 0.3            |
| Hypertension (%)                             | 7 (18)            | 2 (13)               | 1 (5)               | 0.43           |
| Maternal asthma (%)                          | 7 (18)            | 3 (19)               | 2 (11)              | 0.75           |
| Chorionamnionitis (%)                        | 7 (18)            | 3 (19)               | 0 (0)               | 0.14           |
| Maternal antibiotics (%)                     | 18 (46)           | 16 (100)             | 19 (100)            | <0.001         |
| Meconium-stained amniotic fluid (%)          | 12 (31)           | 6 (38)               | 1 (5)               | 0.06           |
| Birth weight, g                              | 3,505 ± 413       | 3,331 ± 421          | 3,687 ± 528         | 0.07           |
| Infant antibiotics (%)                       | 6 (16)            | 4 (25)               | 0 (0)               | 0.09           |
| Any formula in hospital (%)                  | 10 (26)           | 9 (56)               | 9 (47)              | 0.05           |
| Breastfeeding (hospital discharge) (%)       | 27 (69)           | 7 (44)               | 10 (53)             | 0.06           |
| Exclusive breastfeeding, 2 weeks (%)         | 25 (63)           | 7 (44)               | 9 (47)              | 0.63           |
| Duration of 2nd stage (median, IQR)          | 0.7 (0.3, 2)      | 4.2 (3, 4.2)         | –                   | 0.002          |
| Duration of ruptured membranes (median, IQR) | 6 (2, 16)         | 8 (1, 13)            | –                   | 0.8            |

BMI, body mass index.

<sup>a</sup>χ<sup>2</sup>, ANOVA, or Kruskal-Wallis.

antibiotic treatment was associated with the loss of *Bacteroides* in week 2, we compared the relative abundance of *Bacteroides* in vaginally delivered children at week 2, but found no effect of maternal antibiotics during labor on the *Bacteroides* colonization pattern (Figure S1C). While maternal antibiotic regimens varied within each delivery group (Table S2), the primary difference between delivery modes is that most women who had a CS received cefazolin, while most women with a vaginal delivery received ampicillin (when treated with antibiotics). These two antibiotics are from related classes (cephalosporins and penicillins) and target similar microbial classes. Thus, while there may be subtle differences in the types of antibiotics used between delivery groups, this is likely not a significant contributor to differences in infant *Bacteroides* colonization.

We then explored what may cause the loss of *Bacteroides* in week 2. We compared infant characteristics across the *Bacteroides* colonization patterns. While delivery mode was significantly associated with *Bacteroides* colonization, infant characteristics such as exposure to formula in the hospital, breastfeeding at week 2, and infant receipt of antibiotics were not (Table S1A). Exposure to formula in the first week of life was

higher after CS delivery (51% versus 26%,  $p = 0.02$ ; Table 1), so analyses were controlled for this variable. As previous analyses have suggested that exposure to the vaginal microbiome is the source of differences in gut microbiota between vaginal and C-section-delivered infants, we asked whether longer exposure increased the chances of persistent *Bacteroides* colonization. We compared the duration of vaginal exposure in infants who experienced labor (vaginal or post-labor CS deliveries) using two variables: the time between membrane rupture and delivery and the length of the second stage of labor (time between full dilation and birth). The length of the second stage was in fact shorter in infants with persistent *Bacteroides* colonization (Tables S1A and S1B), suggesting that the persistence of *Bacteroides* colonization is not a result of vaginal exposure.

We next wondered whether maternal factors influenced the infant *Bacteroides* colonization patterns. We examined the relationship between maternal microbial communities and the infant *Bacteroides* colonization phenotype (using linear regression; see Method Details). We found no statistically significant difference in maternal rectal colonization between infant *Bacteroides* colonization phenotypes. Although vaginal exposure is proposed as a potential source for infant gut colonization, it cannot account for the *Bacteroides* phenotype, as only a single maternal vaginal sample had detectable ( $\geq 0.1\%$ ) *Bacteroides* colonization. Some authors have suggested that the differences seen in the infant gut microbiome due to delivery mode point to underlying differences in women who have CSs compared to those who deliver vaginally.<sup>26</sup> When we compared the relative abundance of individual species in maternal rectal samples across delivery modes, we found a higher abundance of *B. ovatus* ( $q = 0.226$ ), *B. dorei* ( $q = 0.234$ ), and *B. uniformis* ( $q = 0.236$ ) in mothers who had a vaginal delivery versus those who had a CS delivery, although the numbers were small.

Finally, we hypothesized that the later loss of *Bacteroides* may be due to competition within the infant gut. To address this question, we compared week 1 samples from all of the CS infants to those born vaginally to identify additional taxa that may be associated with the delivery mode and predict the loss of *Bacteroides* in week 2. Interestingly, we found a higher abundance of the genera *Streptococcus* and *Haemophilus* in CS-born children in week 1 samples, before the disappearance of *Bacteroides* (Figures 1B, S2A, and S2B). Across all samples and all time points, the relative abundances of *Bacteroides* and either *Streptococcus* or *Haemophilus* were inversely correlated (Figures S2C and S2D). When we compare the week 1 samples of infants with persistent *Bacteroides* colonization versus early-only, we found a higher relative abundance of *Bacteroides* (coefficient = 0.09,  $q = 0.006$ ) and a lower relative abundance of *Streptococcus* (coefficient =  $-0.03$ ,  $q = 0.23$ ) in infants who have persistent *Bacteroides* colonization. The relative abundance of *Haemophilus* was not significantly different between the persistent and early-only groups (coefficient 0.02,  $q = 0.72$ ). These results could suggest competition between *Streptococcus* and *Bacteroides* in early life as one factor contributing to the loss of *Bacteroides* in the second week of life.

We next asked, for children in whom we observe *Bacteroides* in week 1 samples, what is the source of these strains? Specifically, are the infant strains shared with their mothers? It is

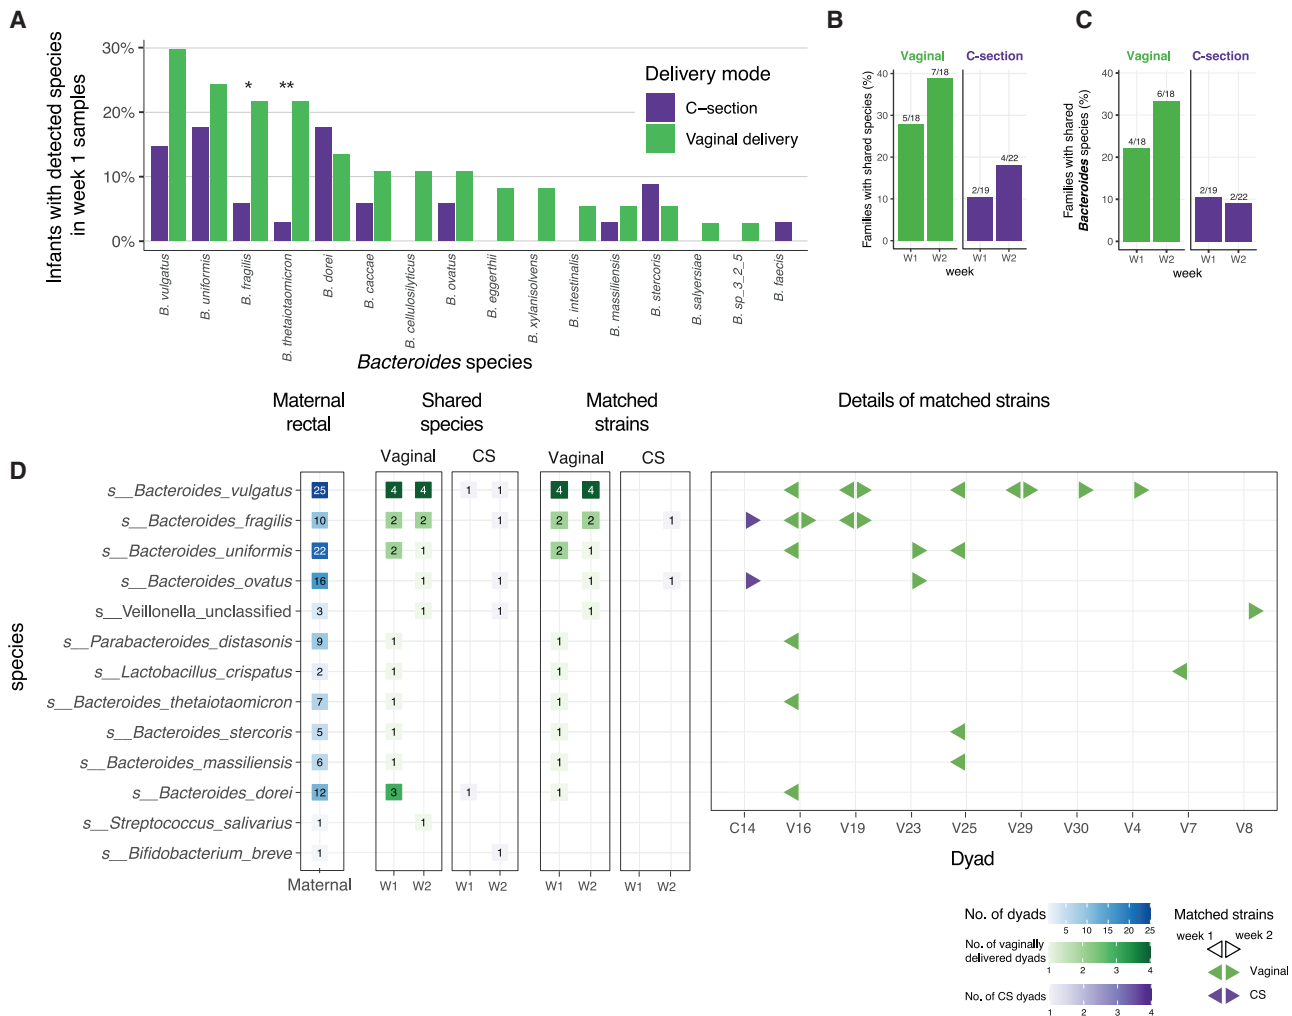

**Figure 2. Shared Species and Strain between Maternal Rectal and Infant Stool Samples Using Metagenomic Sequencing**

(A) Comparison of *Bacteroides* species prevalence across delivery modes, among infants with detectable *Bacteroides* in week 1 samples ( $\geq 0.1\%$ ,  $n = 67$ ). (B) Mother-infant dyads with shared species between maternal rectal swabs and infant stool samples in either week 1 or week 2 samples ( $\geq 0.1\%$ ,  $n = 18$  vaginal delivery,  $n = 22$  CS delivery). (C) Mother-infant dyads with shared *Bacteroides* species. (D) Detailed view of shared species and matched strains in mother-infant dyads by delivery mode and week of sampling. A total of 10 dyads (9 vaginal, 1 CS) demonstrated evidence of shared strains between maternal rectal and infant stool samples.

possible that the source of the *Bacteroides* strains plays a role in its persistence in an infant's gut. The data above suggest that *Bacteroides* colonization is not dependent on whether an infant was exposed to the birth canal, as we saw no differences between our pre- and post-labor CS groups. Therefore, for analysis of the source of infant colonization, we considered all CSs together as a single group. Because exiting the birth canal brings the infant in proximity to the maternal rectum, we hypothesized that during a vaginal delivery, the infant is exposed to bacterial strains from the maternal gut microbiota. To obtain species-level resolution and be able to ask strain-level questions, we used metagenomic sequencing.

We first looked for species-level taxonomic differences between vaginally and CS-delivered infants. Among infants with

*Bacteroides* detected in the first week of life, *B. fragilis* and *B. thetaiotaomicron* were more common in vaginally delivered infants (Figure 2A). As noted previously, neither of these species were found more frequently in maternal samples from either delivery mode. To compare strains between mothers and infants using metagenomic data, we used strict criteria for sequencing depth (see Method Details). Among the dyads in which both maternal and infant samples met these criteria, 5/18 (28%) vaginally delivered infants shared at least one species of any genus with their mothers in week 1 samples, compared to 2/19 (11%) CS-delivered infants (Figure 2B). This difference persisted in week 2 samples: 7/18 (39%) versus 4/22 (18%). Most of the shared species were *Bacteroides*, meaning that vaginally

delivered infants were more likely to share a *Bacteroides* species with their mothers (Figure 2C).

We next turned to identify matched strains between mother and infant species that may suggest a possible transmission event, using single-nucleotide variants extracted from the metagenomic reads (see Method Details). As the infant gut and the adult gut harbor different microbial communities, we are limited in this analysis to species that are shared within at least one dyad with sufficient coverage (Figure 2D). Among the 7 dyads with shared species in week 1, the 5 with matching strains were all vaginally delivered children, while the two CS infants with shared species did not have the same strain as their mothers (Figure 2D). In week 2, among the 11 dyads who shared a species with their mother, 7/7 (100%) vaginally delivered infants had a matched strain, while only 1 of 4 (25%) CS infants with shared species also had shared strains (Figure 2D).

Finally, it has been suggested that vaginally delivered infants acquire *Lactobacillus* species from their mothers as they pass through the birth canal.<sup>13</sup> Despite 75% of mothers having >80% relative abundance of *Lactobacillus* in vaginal samples (Figure S3A), we did not observe higher abundance of *Lactobacillus* species in the gut microbiome of children born vaginally. Using 16S rRNA sequencing, 23 infants had *Lactobacillus* detected ( $\geq 0.1\%$  relative abundance) in week 1 stool samples, of which 16 (70%) were vaginally delivered. However, using shotgun sequencing (necessary for strain-matching analysis), only 2 infants had *Lactobacillus* species detected in week 1 samples ( $\geq 0.1\%$ ), both vaginally delivered. In both cases, maternal samples had a high proportion (>90%) of the same *Lactobacillus* species. If we extend this analysis to additional vaginal microbes, among 85 species found at  $\geq 0.1\%$  in any maternal vaginal samples, there were only 5 dyads (2 vaginal deliveries, 3 CS after labor) in which an infant had detectable colonization by a maternal vaginal species (Figure S3B), suggesting that the transmission of maternal vaginal species to the infant is not exclusive to vaginal deliveries and is infrequent or in low abundance.

## DISCUSSION

To summarize, we sequenced microbiomes from 75 newborns and their mothers close to the time of delivery to determine the impact of delivery mode on the origin of the infant gut microbiome.

Our results confirm the association between CS and lack of durable *Bacteroides* colonization, but challenge the dogma that this difference is due to lack of vaginal exposure. Identifying the canonical CS microbial signature in infants delivered by post-labor CS suggests that the major factor driving the association between birth mode and infant microbiota is not entering the birth canal, but rather exiting through it. The similarity between infants delivered by CS before or after labor is consistent with findings in the Baby Biome Study from the United Kingdom,<sup>11</sup> which sampled infants once in the first week of life. We did not find evidence of vaginal microbiota transmission from mothers to their vaginally delivered infants, and very few infants had detectable levels of *Lactobacillus* (the most common vaginal microbiome member) in their gut community, also consistent with Baby Biome Study findings.<sup>11</sup> The strongest strain-level ev-

idence for bacterial transmission at birth is found in vaginally delivered children but stems from the maternal rectal source. Our results suggest that the establishment of the initial infant gut microbial community requires more than topical exposure to maternal vaginal microbes.

Multiple infant samples collected during the first week of life enabled us to question the timing of the canonical CS microbial signature, namely the depletion of *Bacteroides* species in the first 6–18 months. To our surprise, we found that a majority of infants born by pre- or post-labor CS had detectable levels of gut *Bacteroides* species during their first week of life, which disappeared in their second week of life. These results raise interesting questions: first, why do these *Bacteroides* disappear? Second, from where are they acquired? In 8 infants, we were able to identify matched strains in the maternal rectal swabs that appear to be the source of *Bacteroides* species; more often than not, however, standard metagenomic sequencing was insufficient to identify the source strain from mother vaginal or rectal samples. Likely, more targeted, species-specific methods would be necessary to bridge this gap.

Our data suggest that the origin of infant microbial differences may lie in both the source of the microbes and the infant environment that they are colonizing. The disappearance of *Bacteroides* species in the second week of life from infants born via CS suggests either the lack of a supporting factor, the introduction of an antagonist, or differences in the fitness of colonizing strains. A well-characterized cohort of vaginally delivered infants suggested that infant “seeding” likely originated from several maternal sites and that the ability of those microbes to persist may be related to the relative fitness of a given isolate for the gut environment.<sup>18</sup> In our cohort, infants born by CS were less likely to have *B. fragilis* or *B. thetaiotaomicron* compared to vaginally delivered infants, two species of significant importance to gut health in adults. This may reflect differences in the source of colonization or colonization with less fit species after CS delivery. Alternatively, the experience of being delivered by CS may alter the infant gut environment in a way that makes it less receptive to colonization, although we could not assess this in our cohort. Competition with co-occurring taxa may also play a role in defining the community of microbes that persists beyond initial exposure. Our data support *Streptococcus* and *Haemophilus* as potential antagonists to *Bacteroides* persistence, as their abundance in week 1 samples was negatively associated with establishing persistent *Bacteroides* colonization. The striking negative correlation between *Bacteroides* and *Streptococcus* could be due to *Streptococcus* species filling a niche that was vacated or to direct competition between the two genera. In several body sites, *Streptococcus* species are known to compete with other members of the microbial community. For example, species in the *S. mitis* group can produce hydrogen peroxide, which inhibits the growth of other oral microbes,<sup>27,28</sup> and *S. oralis* can inhibit pathogen growth and biofilm formation.<sup>29</sup> Either of these mechanisms could account for the negative correlation between *Streptococcus* and *Bacteroides*. *Haemophilus* is more commonly thought of as an oropharyngeal colonizer, but has been found to be increased in CS-delivered infants<sup>1</sup> and inversely correlated with *Bacteroides* abundance in other cohorts.<sup>30</sup>

Feeding practices may also be a significant influence on community composition. In the Canadian Healthy Infant Longitudinal Development (CHILD) cohort, even a single exposure to formula during the delivery hospitalization was associated with a lower prevalence of *Bifidobacteriaceae* and higher prevalence of *Enterobacteriaceae* at 3 months.<sup>31</sup> Most infants in our cohort were primarily breastfed: 97% at hospital discharge, 91% at 2 weeks. However, upon a review of charts, we found a much higher rate of formula exposure during the delivery hospital stay in CS-delivered infants. The formula exposure was often a single feeding, or a few feedings, until a mother felt comfortable breastfeeding. Formula feeding may be one of several factors that contribute to a difference in the gut microbiota of infants born via CS. Few other studies have evaluated this type of limited, single-instance formula exposure, which can occur even when mothers plan to exclusively breastfeed. We adjusted for feeding practices in our analyses, but larger cohorts are needed to further study these confounding influences.

As infants grow, feeding practices play an increasing role in determining the composition of the infant gut microbiota,<sup>2,31</sup> however, delivery mode has a stronger influence on the composition of the microbial community in the days immediately after birth. Understanding the earliest microbial communities and their determinants is an important component of designing microbiome-related interventions to improve infant health. The collection of multiple stool samples from early life, as well as maternal vaginal and gut microbiome, breast milk samples, and other possible sites of exposure such as the skin of family members may be necessary to provide a complete picture of how early colonization is established. Part of the challenge in early-life samples is the low biomass of the stool samples. Fortunately, constant improvement in the methods for profiling low-biomass samples<sup>23,32</sup> will make it increasingly feasible to study the strain-level infant gut colonization at the very early stages of life.

Our results demonstrate that maternal seeding of the infant gut microbiome can occur, but is not a straightforward transfer of the maternal vaginal microbial community. We also show that the impact of CS delivery on the infant gut community is a delayed effect; this suggests that the influence of surgical delivery is not solely a difference in the source bacteria but also in colonization efficiency. This would suggest that the strategy of “vaginal seeding” or transferring maternal vaginal secretions to CS-delivered infants may not be effective. Our findings demonstrate the complexity of establishing a microbial community and our lack of understanding of how obstetric care influences infants.

### Limitations of Study

Due to the within- and between-individual variability in composition of the gut microbiota, our sample size may be too small to identify the more subtle differences between groups. Both 16S and shotgun sequencing may lack the sensitivity to detect very-low-abundance *Bacteroides* colonization, which could lead to misclassification bias by assigning infants as “never colonized” when they may have had transient colonization. In addition, early infant stool samples have low microbial biomass, which leads to variability in read depth and quality of sequencing. The inclusion of more participants and the use of newer

sequencing and analysis pipelines in future research would reduce these limitations.

### STAR★METHODS

Detailed methods are provided in the online version of this paper and include the following:

- KEY RESOURCES TABLE
- RESOURCE AVAILABILITY
  - Lead Contact
  - Materials Availability
  - Data and Code Availability
- EXPERIMENTAL MODEL AND SUBJECT DETAILS
- METHOD DETAILS
  - Sample collection
  - DNA Extraction and sequencing
  - Sequence processing and analysis
  - Mother-child strain transmission analysis
- QUANTIFICATION AND STATISTICAL ANALYSIS

### SUPPLEMENTAL INFORMATION

Supplemental Information can be found online at <https://doi.org/10.1016/j.xcrm.2020.100156>.

### ACKNOWLEDGMENTS

We thank T. Poon, L. Besse, S. Steelman, and C. Nusbaum (Broad Institute) for help in sequence production and sample and data management; V. Subramanian and T. Arthur for experimental methods support and helpful discussions; T. Reimels for valuable figure and text support; the nurses, midwives, and clinicians at the Labor and Delivery Department at Massachusetts General Hospital for their enthusiastic collaboration during enrollment; and the families that agreed to enroll and donate samples. C.M. was supported by the Vincent Memorial Research Funds; E.S.L. was supported by National Human Genome Research Institute grant 2U54HG003067-10; R.J.X. was supported by funding from JDRF, CCFR, and NIH grants R01 DK092405 and P30 DK043351; and M.Y. was supported by NIH grant DK113224-01, Israel Science Foundation grant 2660/18, an Azrieli Foundation Faculty Fellowship, and a BroadIgnite early career grant from the Broad Institute of MIT and Harvard.

### AUTHOR CONTRIBUTIONS

C.M.M. and M.Y. designed the study. C.M.M., A. Bryant, S.P., P.H., M.C., K.S., and M.Y. enrolled participants and conducted the study. A. Bergerat, A.C., and H.V. performed laboratory analyses. C.M.M., C.H., E.S.L., H.V., R.J.X., and M.Y. supervised the study. C.M.M., C.M., L.H., H.V., R.J.X., E.S.L., and M.Y. designed and conducted the analyses of data. All of the authors contributed to writing the manuscript and signed off on the final format.

### DECLARATION OF INTERESTS

C.M.M. receives grant funding from Merck and has served as a consultant for Scynexis. C.H. is a member of the Seres Therapeutics, Empress Therapeutics, and ZOE Nutrition scientific advisory boards. E.S.L. serves on the board of directors for Codiak BioSciences and on the scientific advisory board of F-Prime Capital Partners and Third Rock Ventures; he is also affiliated with several non-profit organizations, including serving on the board of directors of the Innocence Project, Count Me In, and the Biden Cancer Initiative, and the board of trustees for the Parker Institute for Cancer Immunotherapy. He has served and continues to serve on various federal advisory committees. R.J.X. is a consultant to Nestlé.



Received: January 29, 2020  
Revised: September 29, 2020  
Accepted: November 19, 2020  
Published: December 22, 2020

### SUPPORTING CITATIONS

The following references appear in the supplemental information: Stockholm et al.<sup>33</sup> and Hill et al.<sup>34</sup>

### REFERENCES

- Bäckhed, F., Roswall, J., Peng, Y., Feng, Q., Jia, H., Kovatcheva-Datchary, P., Li, Y., Xia, Y., Xie, H., Zhong, H., et al. (2015). Dynamics and Stabilization of the Human Gut Microbiome during the First Year of Life. *Cell Host Microbe* *17*, 690–703.
- Bokulich, N.A., Chung, J., Battaglia, T., Henderson, N., Jay, M., Li, H., D Lieber, A., Wu, F., Perez-Perez, G.I., Chen, Y., et al. (2016). Antibiotics, birth mode, and diet shape microbiome maturation during early life. *Sci. Transl. Med.* *8*, 343ra82.
- Yatsunenko, T., Rey, F.E., Manary, M.J., Trehan, I., Dominguez-Bello, M.G., Contreras, M., Magris, M., Hidalgo, G., Baldassano, R.N., Anokhin, A.P., et al. (2012). Human gut microbiome viewed across age and geography. *Nature* *486*, 222–227.
- Yassour, M., Vatanen, T., Siljander, H., Hämäläinen, A.-M., Härkönen, T., Ryhänen, S.J., Franzosa, E.A., Vlamakis, H., Huttenhower, C., Gevers, D., et al.; DIABIMMUNE Study Group (2016). Natural history of the infant gut microbiome and impact of antibiotic treatment on bacterial strain diversity and stability. *Sci. Transl. Med.* *8*, 343ra81.
- Azad, M.B., Konya, T., Persaud, R.R., Guttman, D.S., Chari, R.S., Field, C.J., Sears, M.R., Mandhane, P.J., Turvey, S.E., Subbarao, P., et al.; CHILD Study Investigators (2016). Impact of maternal intrapartum antibiotics, method of birth and breastfeeding on gut microbiota during the first year of life: a prospective cohort study. *BJOG* *123*, 983–993.
- Madan, J.C., Hoen, A.G., Lundgren, S.N., Farzan, S.F., Cottingham, K.L., Morrison, H.G., Sogin, M.L., Li, H., Moore, J.H., and Karagas, M.R. (2016). Association of Cesarean Delivery and Formula Supplementation With the Intestinal Microbiome of 6-Week-Old Infants. *JAMA Pediatr.* *170*, 212–219.
- Jakobsson, H.E., Abrahamsson, T.R., Jenmalm, M.C., Harris, K., Quince, C., Jernberg, C., Björkstén, B., Engstrand, L., and Andersson, A.F. (2014). Decreased gut microbiota diversity, delayed Bacteroidetes colonisation and reduced Th1 responses in infants delivered by caesarean section. *Gut* *63*, 559–566.
- Brumbaugh, D.E., Arruda, J., Robbins, K., Ir, D., Santorico, S.A., Robertson, C.E., and Frank, D.N. (2016). Mode of Delivery Determines Neonatal Pharyngeal Bacterial Composition and Early Intestinal Colonization. *J. Pediatr. Gastroenterol. Nutr.* *63*, 320–328.
- Sordillo, J.E., Zhou, Y., McGeachie, M.J., Ziniti, J., Lange, N., Laranjo, N., Savage, J.R., Carey, V., O'Connor, G., Sandel, M., et al. (2017). Factors influencing the infant gut microbiome at age 3–6 months: findings from the ethnically diverse Vitamin D Antenatal Asthma Reduction Trial (VDAART). *J. Allergy Clin. Immunol.* *139*, 482–491.e14.
- Stewart, C.J., Ajami, N.J., O'Brien, J.L., Hutchinson, D.S., Smith, D.P., Wong, M.C., Ross, M.C., Lloyd, R.E., Doddapaneni, H., Metcalf, G.A., et al. (2018). Temporal development of the gut microbiome in early childhood from the TEDDY study. *Nature* *562*, 583–588.
- Shao, Y., Forster, S.C., Tsiliki, E., Vervier, K., Strang, A., Simpson, N., Kumar, N., Stares, M.D., Rodger, A., Brocklehurst, P., et al. (2019). Stunted microbiota and opportunistic pathogen colonization in caesarean-section birth. *Nature* *574*, 117–121.
- Reyman, M., van Houten, M.A., van Baarle, D., Bosch, A.A.T.M., Man, W.H., Chu, M.L.J.N., Arp, K., Watson, R.L., Sanders, E.A.M., Fuentes, S., and Bogaert, D. (2019). Impact of delivery mode-associated gut microbiota dynamics on health in the first year of life. *Nat. Commun.* *10*, 4997.
- Dominguez-Bello, M.G., Costello, E.K., Contreras, M., Magris, M., Hidalgo, G., Fierer, N., and Knight, R. (2010). Delivery mode shapes the acquisition and structure of the initial microbiota across multiple body habitats in newborns. *Proc. Natl. Acad. Sci. USA* *107*, 11971–11975.
- Chu, D.M., Ma, J., Prince, A.L., Antony, K.M., Seferovic, M.D., and Aagaard, K.M. (2017). Maturation of the infant microbiome community structure and function across multiple body sites and in relation to mode of delivery. *Nat. Med.* *23*, 314–326.
- Dogra, S., Sakwinska, O., Soh, S.-E., Ngom-Bru, C., Brück, W.M., Berger, B., Brüßow, H., Lee, Y.S., Yap, F., Chong, Y.S., et al.; GUSTO Study Group (2015). Dynamics of infant gut microbiota are influenced by delivery mode and gestational duration and are associated with subsequent adiposity. *MBio* *6*, e02419-14.
- Mueller, N.T., Shin, H., Pizoni, A., Werlang, I.C., Matte, U., Goldani, M.Z., Goldani, H.A., and Dominguez-Bello, M.G. (2016). Birth mode-dependent association between pre-pregnancy maternal weight status and the neonatal intestinal microbiome. *Sci. Rep.* *6*, 23133.
- Shi, Y.-C., Guo, H., Chen, J., Sun, G., Ren, R.-R., Guo, M.Z., Peng, L.H., and Yang, Y.S. (2018). Initial meconium microbiome in Chinese neonates delivered naturally or by cesarean section. *Sci. Rep.* *8*, 3255.
- Ferretti, P., Pasolli, E., Tett, A., Asnicar, F., Gorfer, V., Fedi, S., Armanini, F., Truong, D.T., Manara, S., Zolfo, M., et al. (2018). Mother-to-Infant Microbial Transmission from Different Body Sites Shapes the Developing Infant Gut Microbiome. *Cell Host Microbe* *24*, 133–145.e5.
- Yassour, M., Jason, E., Hogstrom, L.J., Arthur, T.D., Tripathi, S., Siljander, H., Selvenius, J., Oikarinen, S., Hyöty, H., Virtanen, S.M., et al. (2018). Strain-Level Analysis of Mother-to-Child Bacterial Transmission during the First Few Months of Life. *Cell Host Microbe* *24*, 146–154.e4.
- Nayfach, S., Rodriguez-Mueller, B., Garud, N., and Pollard, K.S. (2016). An integrated metagenomics pipeline for strain profiling reveals novel patterns of bacterial transmission and biogeography. *Genome Res.* *26*, 1612–1625.
- Korpela, K., Costea, P., Coelho, L.P., Kandels-Lewis, S., Willemsen, G., Boomsma, D.I., Segata, N., and Bork, P. (2018). Selective maternal seeding and environment shape the human gut microbiome. *Genome Res.* *28*, 561–568.
- Pereira-Marques, J., Hout, A., Ferreira, R.M., Weber, M., Pinto-Ribeiro, I., van Doorn, L.J., Knetsch, C.W., and Figueiredo, C. (2019). Impact of Host DNA and Sequencing Depth on the Taxonomic Resolution of Whole Metagenome Sequencing for Microbiome Analysis. *Front. Microbiol.* *10*, 1277.
- Hillmann, B., Al-Ghalith, G.A., Shields-Cutler, R.R., Zhu, Q., Gohl, D.M., Beckman, K.B., Knight, R., and Knights, D. (2018). Evaluating the Information Content of Shallow Shotgun Metagenomics. *mSystems* *3*. <https://doi.org/10.1128/mSystems.00069-18>.
- Morgan, X.C., Tickle, T.L., Sokol, H., Gevers, D., Devaney, K.L., Ward, D.V., Reyes, J.A., Shah, S.A., LeLeiko, N., Snapper, S.B., et al. (2012). Dysfunction of the intestinal microbiome in inflammatory bowel disease and treatment. *Genome Biol.* *13*, R79.
- Dominguez-Bello, M.G., De Jesus-Laboy, K.M., Shen, N., Cox, L.M., Amir, A., Gonzalez, A., Bokulich, N.A., Song, S.J., Hoashi, M., Rivera-Vinas, J.I., et al. (2016). Partial restoration of the microbiota of cesarean-born infants via vaginal microbial transfer. *Nat. Med.* *22*, 250–253.
- Stinson, L.F., Payne, M.S., and Keelan, J.A. (2018). A Critical Review of the Bacterial Baptism Hypothesis and the Impact of Cesarean Delivery on the Infant Microbiome. *Front. Med. (Lausanne)* *5*, 135.
- Okahashi, N., Nakata, M., Sumitomo, T., Terao, Y., and Kawabata, S. (2013). Hydrogen peroxide produced by oral Streptococci induces macrophage cell death. *PLOS ONE* *8*, e62563.
- Jakubovics, N.S., Gill, S.R., Vickerman, M.M., and Kolenbrander, P.E. (2008). Role of hydrogen peroxide in competition and cooperation

- between *Streptococcus gordonii* and *Actinomyces naeslundii*. *FEMS Microbiol. Ecol.* 66, 637–644.
29. Fiedler, T., Riani, C., Koczan, D., Standar, K., Kreikemeyer, B., and Podbielski, A. (2013). Protective mechanisms of respiratory tract *Streptococci* against *Streptococcus pyogenes* biofilm formation and epithelial cell infection. *Appl. Environ. Microbiol.* 79, 1265–1276.
  30. Cong, X., Xu, W., Janton, S., Henderson, W.A., Matson, A., McGrath, J.M., Maas, K., and Graf, J. (2016). Gut Microbiome Developmental Patterns in Early Life of Preterm Infants: Impacts of Feeding and Gender. *PLOS ONE* 11, e0152751.
  31. Forbes, J.D., Azad, M.B., Vehling, L., Tun, H.M., Konya, T.B., Guttman, D.S., Field, C.J., Lefebvre, D., Sears, M.R., Becker, A.B., et al.; Canadian Healthy Infant Longitudinal Development (CHILD) Study Investigators (2018). Association of Exposure to Formula in the Hospital and Subsequent Infant Feeding Practices With Gut Microbiota and Risk of Overweight in the First Year of Life. *JAMA Pediatr.* 172, e181161.
  32. Caruso, V., Song, X., Asquith, M., and Karstens, L. (2019). Performance of Microbiome Sequence Inference Methods in Environments with Varying Biomass. *mSystems* 4. <https://doi.org/10.1128/mSystems.00163-18>.
  33. Stokholm, J., Blaser, M.J., Thorsen, J., Rasmussen, M.A., Waage, J., Vinding, R.K., Schoos, A.M., Kunøe, A., Fink, N.R., Chawes, B.L., et al. (2018). Maturation of the gut microbiome and risk of asthma in childhood. *Nat. Commun.* 9, 141.
  34. Hill, C.J., Lynch, D.B., Murphy, K., Ulaszewska, M., Jeffery, I.B., O'Shea, C.A., Watkins, C., Dempsey, E., Mattivi, F., Tuohy, K., et al. (2017). Evolution of gut microbiota composition from birth to 24 weeks in the INFANTMET Cohort. *Microbiome* 5, 4.
  35. Truong, D.T., Franzosa, E.A., Tickle, T.L., Scholz, M., Weingart, G., Pasolli, E., Tett, A., Huttenhower, C., and Segata, N. (2015). MetaPhlan2 for enhanced metagenomic taxonomic profiling. *Nat. Methods* 12, 902–903.
  36. Davis, N.M., Proctor, D.M., Holmes, S.P., Relman, D.A., and Callahan, B.J. (2018). Simple statistical identification and removal of contaminant sequences in marker-gene and metagenomics data. *Microbiome* 6, 226.
  37. Caporaso, J.G., Kuczynski, J., Stombaugh, J., Bittinger, K., Bushman, F.D., Costello, E.K., Fierer, N., Peña, A.G., Goodrich, J.K., Gordon, J.I., et al. (2010). QIIME allows analysis of high-throughput community sequencing data. *Nat. Methods* 7, 335–336.
  38. McDonald, D., Price, M.N., Goodrich, J., Nawrocki, E.P., DeSantis, T.Z., Probst, A., Andersen, G.L., Knight, R., and Hugenholtz, P. (2012). An improved Greengenes taxonomy with explicit ranks for ecological and evolutionary analyses of bacteria and archaea. *ISME J.* 6, 610–618.

## STAR★METHODS

### KEY RESOURCES TABLE

| REAGENT or RESOURCE               | SOURCE                      | IDENTIFIER                                                                                  |
|-----------------------------------|-----------------------------|---------------------------------------------------------------------------------------------|
| Biological Samples                |                             |                                                                                             |
| Infant stool samples              | This study                  | N/A                                                                                         |
| Maternal vaginal and rectal swabs | This study                  | N/A                                                                                         |
| Critical Commercial Assays        |                             |                                                                                             |
| PowerSoil DNA Isolation Kit       | QIAGEN Inc                  | Cat. 47014                                                                                  |
| Chemagic MSM I                    | Perkin Elmer                | CMG-717                                                                                     |
| Deposited Data                    |                             |                                                                                             |
| Raw sequencing data               | This project                | NCBI Sequence Read Archive as BioProject PRJNA591079.                                       |
| Software and Algorithms           |                             |                                                                                             |
| KneadData v0.5.1                  | Huttenhower Lab             | <a href="https://github.com/biobakery/KneadData">https://github.com/biobakery/KneadData</a> |
| MetaPhlAn v2.0                    | Truong et al. <sup>35</sup> | <a href="https://github.com/biobakery/MetaPhlAn">https://github.com/biobakery/MetaPhlAn</a> |
| decontam v1.6.0                   | Davis et al. <sup>36</sup>  | R package                                                                                   |
| MaAsLin2                          | Mallick et al.              | <a href="https://github.com/biobakery/Maaslin2">https://github.com/biobakery/Maaslin2</a>   |

### RESOURCE AVAILABILITY

#### Lead Contact

Further information and requests for resources and reagents should be directed to and will be fulfilled by the Lead Contact, Moran Yassour ([Moranya@mail.huji.ac.il](mailto:Moranya@mail.huji.ac.il)).

#### Materials Availability

This study did not generate any new reagents.

#### Data and Code Availability

The accession number for the sequences reported in this paper is BioProject PRJNA657818. Full metadata is available in [Table S2](#). There is no custom code or unique algorithms that are central to this manuscript.

### EXPERIMENTAL MODEL AND SUBJECT DETAILS

Women with singleton gestation, presenting for delivery at  $\geq 37$  weeks of gestation to the Massachusetts General Hospital Labor & Delivery unit in Boston, MA were enrolled in this prospective cohort study. Participants were excluded if they had known HIV infection, fetal congenital anomaly, gestational age < 37 weeks, maternal age < 18, planned to give up the infant for adoption, or were a gestational carrier. If an enrolled dyad had subsequent admission of the infant to the NICU or special care nursery at any time after delivery, that dyad was excluded.

Human patient research in the OriGiN cohort was reviewed and approved by the Partners Human Research Committee (ref. 2015P000460/PHS). Each mother signed two informed consent forms (one for her and one for her child) prior to participation.

### METHOD DETAILS

#### Sample collection

At enrollment, mothers had vaginal and rectal swabs collected. Vaginal swabs were collected by a provider without a speculum, by parting the labia and inserting a foam swab 3-4 cm, then rotating 3-4 times. Rectal swabs were collected by a provider, who placed a swab 1-2cm into the anus and rotated it twice. Swabs were placed at 4C within 30 min after collection and then at  $-80^{\circ}\text{C}$  within 18 hours and stored until processed.

Infant stool was collected by parents from the diaper once daily during the delivery hospitalization (2-5 days), into tubes containing pure ethanol as a preservative. Study staff collected infant stool samples from parents each day. A sample collection kit was sent to parents, who collected another infant stool sample between day 13-29 of life (also into ethanol) and returned it at room temperature

within 24 hours of collection, via a delivery service. Participants answered a short questionnaire about infant health status and mode of feeding, which was returned with the 2 week stool sample. All stool (home or hospital collected) was stored at room temperature in the ethanol preservative until placed in a  $-80^{\circ}\text{C}$  freezer within 2 days of collection. Participant and infant medical records were abstracted to obtain information about mode of delivery, receipt of antibiotics, reported infant feeding, duration of labor stages, obstetric complications, and health history.

### DNA Extraction and sequencing

Vaginal and rectal swabs were eluted in 400 $\mu\text{L}$  of saline, vortexed for 1 minute and then spun at 10,000  $\times g$  for 10 minutes. The cell pellet underwent DNA extraction using the MoBio Power Soil kit (QIAGEN Inc, Waltham MA). Stool samples underwent DNA extraction using chemical and mechanical lysis with magnetic bead-based purification via the Chemagic MSM I with the Chemagic DNA Blood Kit-96 from Perkin Elmer. Prior to extraction on the MSM-I, TE buffer, lysozyme, proteinase K, and RLT buffer with beta-mercaptoethanol were added to each stool sample. DNA samples were quantified using a fluorescence-based PicoGreen assay.

### Sequence processing and analysis

A total of 427 samples (308 infant stool, 63 vaginal, 56 maternal rectal) from 85 families underwent sequencing. Whole-genome shotgun (WGS) sequencing for all infant and maternal samples was performed on the Illumina NextSeq platform with 100 bp paired-end reads. Reads pairs with fewer than 60 observed bases on either read were excluded from downstream analysis. Read were trimmed based on the following criteria: (1) Removing leading low quality or N bases (below quality 3); (2) Removing trailing low quality or N bases (below quality 3); (3) Scanning the read with a 4-base wide sliding window, cutting when the average quality per base drops below 15. Samples with fewer than 500,000 raw reads were excluded. Read pairs that were attributed to human genomic DNA were removed using KneadData Tool, v0.5.1 using the hg19 human reference genome. To taxonomically profile the bacterial DNA sequences observed in the samples, MetaPhlan 2.0 was used to align reads to the MetaPhlan 2.0 unique marker database. Samples that were fully unclassified by metaphlan were excluded. Samples were also excluded if there were 100 or fewer reads mapping to the species-specific marker genes of a given taxa that was reported at  $> 50\%$  abundance. For inclusion in downstream analysis, samples coming from a given dyad had to pass the quality measures above and meet at least one of the following dyad criteria: a) two or more child samples were available in week 1, b) One or more child samples for week 1 were available and one child sample at week 2, or c) one or more child samples and one or more mother sample available. A subset of 75 families met one or more of these criteria for inclusion. There were 71 infant stool samples from this subset that had sufficient DNA and underwent 16S rRNA sequencing of the V3-V4 region. 16S rRNA gene sequencing was performed as previously described.<sup>4</sup> Taxonomy was assigned using version 1.8.0 of Qiime<sup>37</sup> (with the closed\_reference\_otu function) and the Greengenes reference database of OTUs.<sup>38</sup> Additionally, the R package *decontam*<sup>36</sup> was used to identify contaminating taxa in week 1 taxonomic profiles. Taxa whose relative abundance was found to be significantly correlated to the DNA concentration of samples across the cohort were removed and taxonomic profiles consequently renormalized. The number of reads for both 16S and WGS methods was not different across delivery modes.

### Mother-child strain transmission analysis

We tabulated the species that were observed most frequently in both mother and child samples of the same dyad (Figure 2D). To examine families for possible shared strains within these species, we applied an approach we recently developed to examine sub-species variation between samples.<sup>19</sup> Briefly, coverage overlap events were identified in mother-child pairs where metagenomic reads mapped to the same segment of species-specific marker genes of various species. In these overlap regions, sites of single nucleotide variation (SNV) were tabulated across the set of marker genes for a given species. Samples with fewer than 1000 reads mapping to species-specific marker genes were not considered for this analysis. For analyses of week 1 samples, the sample with the most reads was used to assess strain matching. We report here a matched strain in a dyad, if the infant had a dominant or secondary maternal strain.

### QUANTIFICATION AND STATISTICAL ANALYSIS

A *Bacteroides* colonization phenotype of *early-only* (week 1 only), *persistent* (both week 1 and 2) or *absent* was assigned using 16S rRNA sequencing results, using a detection threshold of 0.1% relative abundance. Associations between maternal and delivery characteristics and this phenotype were examined using chi-square or ANOVA. Linear regression models were run using MaAsLin2, to identify statistically significant associations between microbial features and delivery mode or *Bacteroides* phenotype. Analyses were adjusted for infant feeding,<sup>24</sup> and a q-value threshold of 0.25 was considered significant. Additional comparisons of *Bacteroides* maximal abundance between week 1 and week 2 within delivery mode were made using a t test.

All figures were generated with the R ggplot2 package (version 3.1.0). Boxplots were generated with geom\_boxplot default parameters, such that the box represents 25-75 percentile, and the whiskers from the box to the largest/smallest value no further than  $1.5 \times \text{IQR}$  from the box (where IQR is the inter-quartile range, or distance between the first and third quartiles).

**Cell Reports Medicine, Volume 1**

**Supplemental Information**

**Delivery Mode Affects Stability of**

**Early Infant Gut Microbiota**

**Caroline M. Mitchell, Chiara Mazzoni, Larson Hogstrom, Allison Bryant, Agnes Bergerat, Avital Cher, Shawna Pochan, Penelope Herman, Maureen Carrigan, Karen Sharp, Curtis Huttenhower, Eric S. Lander, Hera Vlamakis, Ramnik J. Xavier, and Moran Yassour**

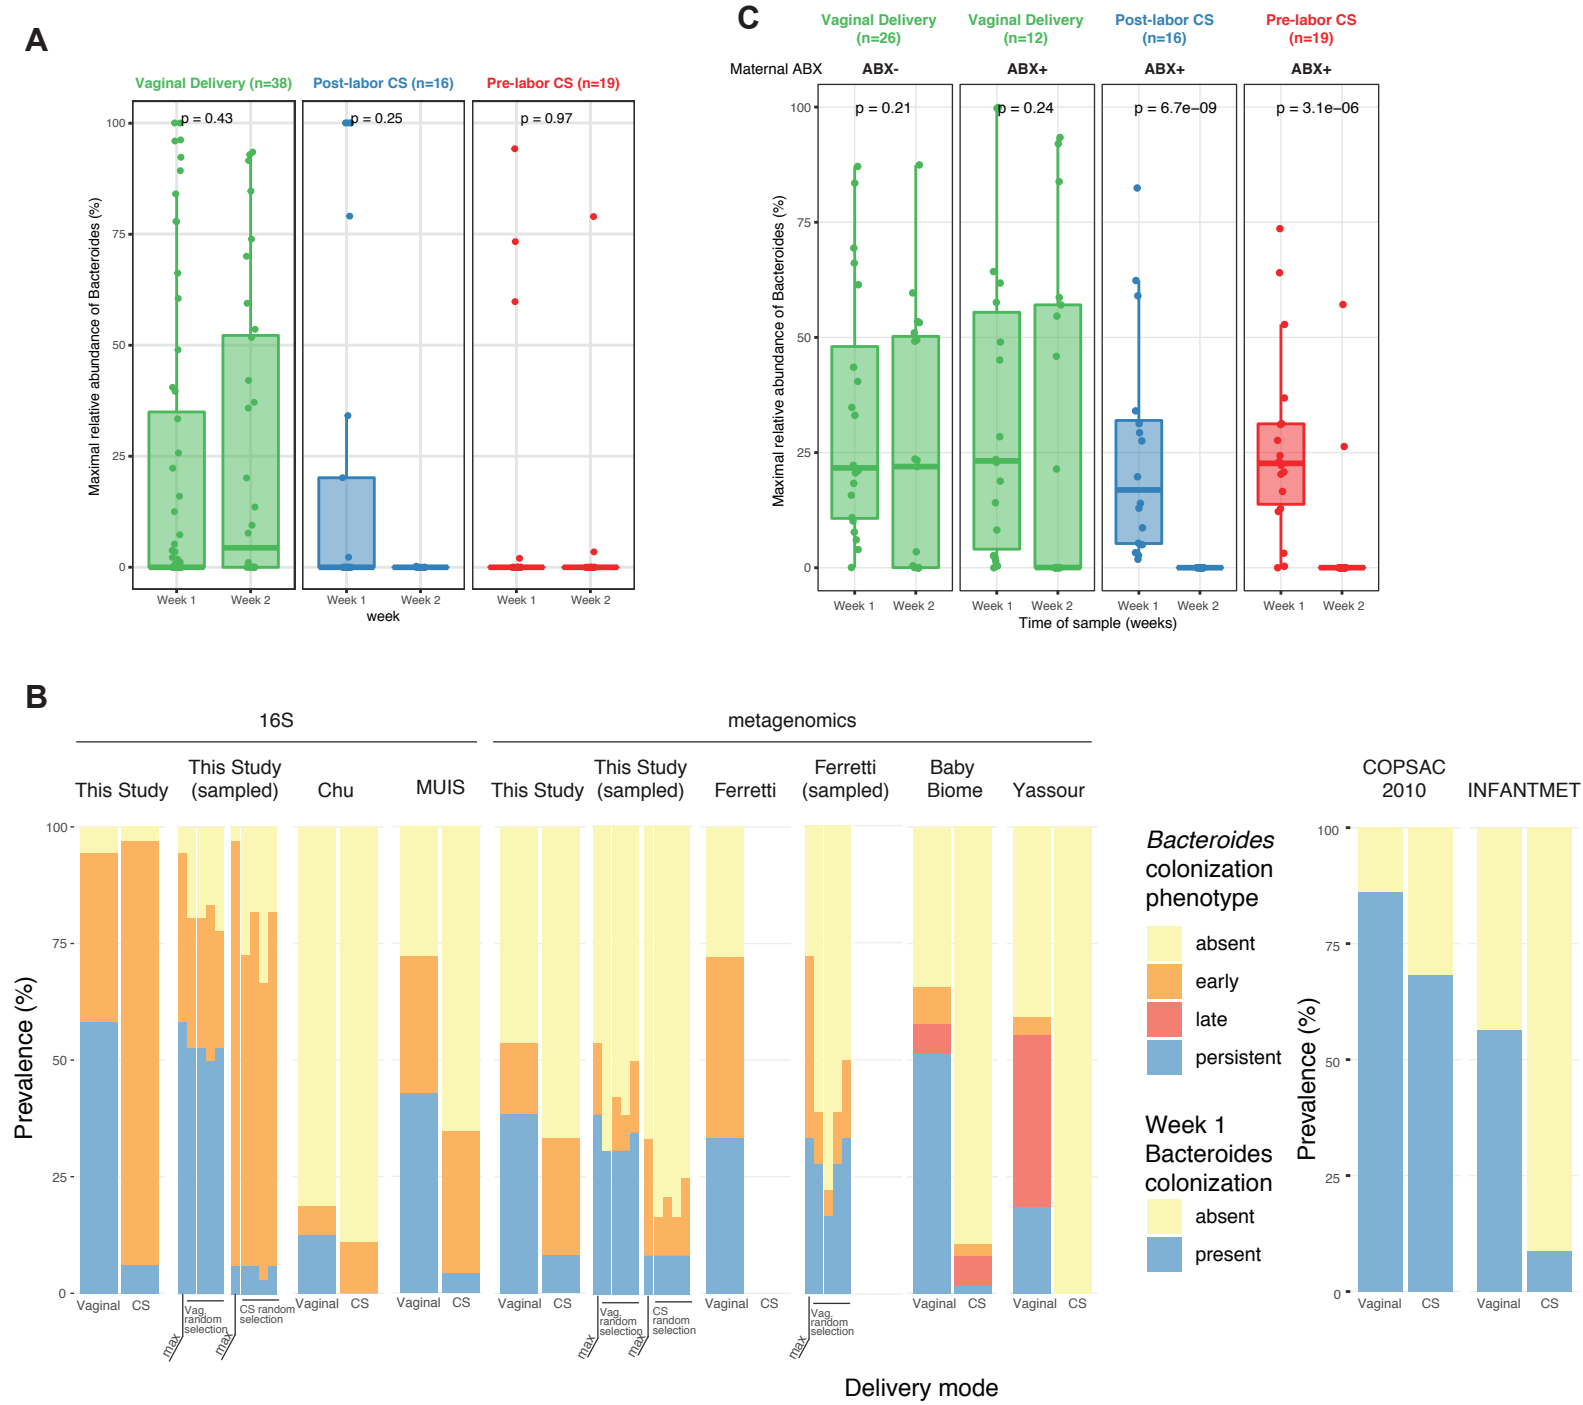

**Figure S1. *Bacteroides* relative abundance through time (week 1 vs. week 2), prevalence and persistence across different cohorts. Related to Figure 1C-D.**

**(A)** Comparison of maximal relative abundance of *Bacteroides* in week 1 vs. week 2 infant stool samples, as measured by metagenomic sequencing, within delivery mode. **(B)** A comparison with previously published data, using publicly available sequences from cohorts with samples from week 1 of life and a later time point to assign *Bacteroides* colonization phenotype (early-only, persistent, absent or late-only). In our data and the single other study with multiple week 1 time points, assignments were made based either on maximal abundance, or a randomly selected time point to demonstrate how a single sample is less likely to identify *Bacteroides* colonization in early life. The mean proportion of “early only” using maximal abundance in our vaginal deliveries, cesarean deliveries, and the Ferretti et al study (26%) was significantly different than the mean proportion of “early only” using random sampling (11%,  $p = 0.002$ ). An additional comparison of week 1 *Bacteroides* detection between vaginal and C-section infants was made in two cohorts which had only that early time point, further demonstrating the range of *Bacteroides* detection in C-section delivered infants. The cohorts included a study of 81 infants from Houston, TX evaluated at day 1 and week 6 (Chu et al.<sup>14</sup>), a Danish cohort of 120 infants evaluated at day 1 and week 2 (MUIS et al.<sup>12</sup>), a cohort of 25 Italian mothers and infants with testing at birth, day 1, 3, 7 and 1 month (Ferretti et al.<sup>18</sup>), a cohort of 596 British infants evaluated at 4, 7 and 21 days (BabyBiome<sup>11</sup>), and a study of 44 Finnish infants measured at birth and 14 days (Yassour et al.<sup>19</sup>). We also compared week 1 *Bacteroides* detection in two cohorts without a follow-up sample, one that included 700 infants from Copenhagen (COPSAC2010<sup>37</sup>) and a cohort of 153 infants from Cork, Ireland (INFANTMET<sup>38</sup>). Detailed information regarding these cohorts is found in Table S3. **(C)** Comparison of maximal abundance of *Bacteroides* in week 1 vs. week 2 infant stool samples within vaginally delivered infants whose mothers did (N = 18) or did not (n = 20) receive antibiotics during labor, or infants delivered by pre- or post-labor C-section (all of whose mothers received antibiotics prior to delivery).

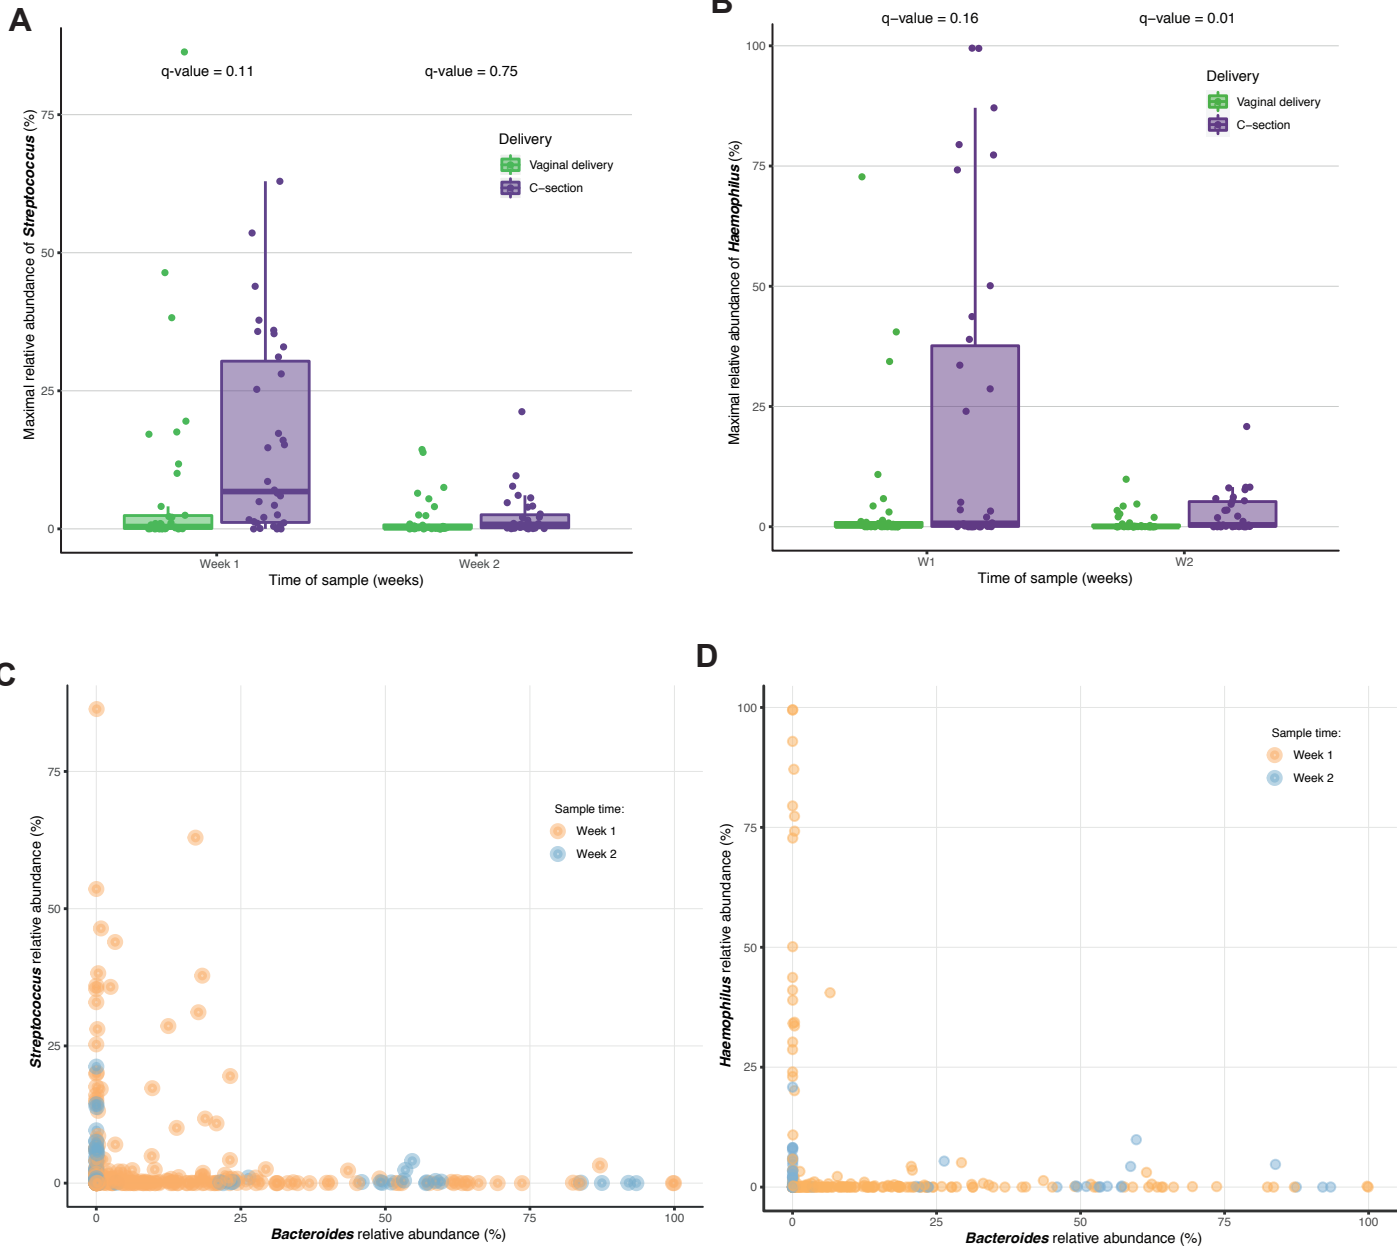

**Figure S2. Analysis of the relative abundance of *Streptococcus* and *Haemophilus* exemplifying the link with *Bacteroides*. Related to Figure 1B.** Maximal relative abundance of *Streptococcus* (A) and *Haemophilus* (B) measured by 16S rRNA sequencing compared between vaginally delivered and C-section delivered infants at week 1 or week 2. Q-values calculated by linear regression, accounting for the feeding of each infant (using MaAsLin2, see Methods). Relative abundance of (C) *Streptococcus* vs. *Bacteroides* or (D) *Haemophilus* vs. *Bacteroides* in week 1 and week 2 infant stool samples.

**A**

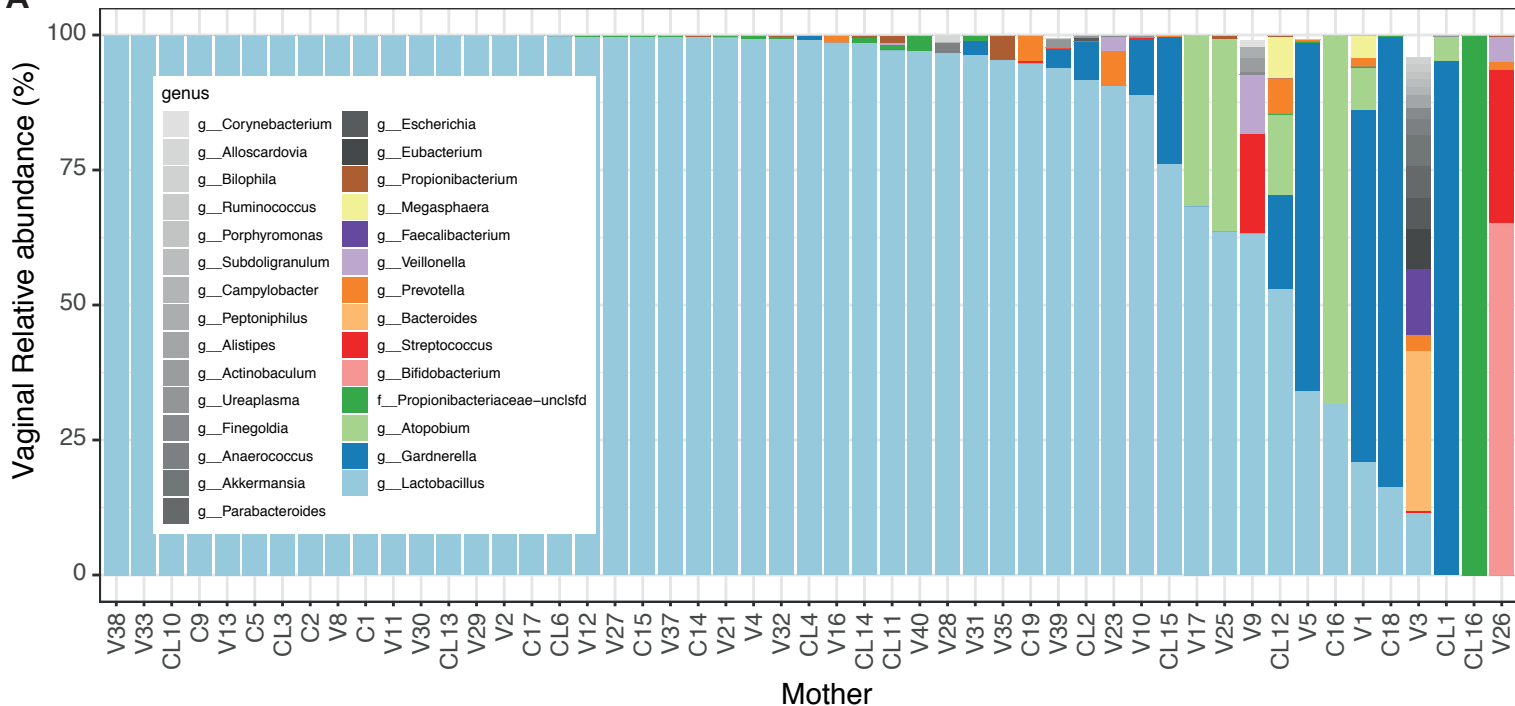

**B**

|                                          | Maternal  | Week 1    |        | Week 2    |        |
|------------------------------------------|-----------|-----------|--------|-----------|--------|
|                                          |           | Child     | Shared | Child     | Shared |
| s__Lactobacillus_crispatus               | <b>29</b> | 2         | 1 (V)  | 0         | 0      |
| s__Lactobacillus_iners                   | <b>19</b> | 0         | 0      | 0         | 0      |
| s__Lactobacillus_jensenii                | <b>13</b> | 0         | 0      | 0         | 0      |
| s__Gardnerella_vaginalis                 | <b>10</b> | 1         | 1 (CL) | 1         | 0      |
| s__Lactobacillus_gasseri                 | <b>6</b>  | 0         | 0      | 1         | 0      |
| s__Atopobium_vaginae                     | <b>6</b>  | 1         | 1 (CL) | 0         | 0      |
| s__Veillonella_atypica                   | <b>3</b>  | 0         | 0      | 5         | 0      |
| s__Prevotella_bivia                      | <b>2</b>  | 0         | 0      | 0         | 0      |
| s__Lactobacillus_sp_7_1_47FAA            | <b>2</b>  | 0         | 0      | 0         | 0      |
| f__Propionibacteriaceae-uncifsd          | <b>2</b>  | <b>11</b> | 1 (CL) | 0         | 0      |
| s__Streptococcus_parasanguinis           | <b>1</b>  | 2         | 0      | 2         | 0      |
| s__Streptococcus_mitis_oralis_pneumoniae | <b>1</b>  | 6         | 0      | 2         | 0      |
| s__Streptococcus_anginosus               | <b>1</b>  | 2         | 0      | 1         | 0      |
| s__Propionibacterium_acnes               | <b>1</b>  | 4         | 0      | 0         | 0      |
| s__Prevotella_timonensis                 | <b>1</b>  | 0         | 0      | 0         | 0      |
| s__Parabacteroides_merdae                | <b>1</b>  | 4         | 0      | 0         | 0      |
| s__Faecalibacterium_prausnitzii          | <b>1</b>  | 4         | 0      | 0         | 0      |
| s__Eubacterium_rectale                   | <b>1</b>  | 3         | 0      | 0         | 0      |
| s__Escherichia_coli                      | <b>1</b>  | <b>18</b> | 0      | <b>14</b> | 0      |
| s__Bifidobacterium_breve                 | <b>1</b>  | 3         | 0      | <b>11</b> | 1 (V)  |
| s__Bacteroides_vulgatus                  | <b>1</b>  | <b>11</b> | 0      | 8         | 0      |
| s__Bacteroides_uniformis                 | <b>1</b>  | <b>9</b>  | 0      | 5         | 0      |
| s__Bacteroides_fragilis                  | <b>1</b>  | <b>7</b>  | 0      | 3         | 0      |

**FigureS3. Vaginal microbiome composition of mothers and their detected species transmission to infants. Related to Figure 1B.**

(A) Genus-level microbiome composition of maternal vaginal swabs collected prior to delivery, using metagenomic sequencing. We included the top 29 vaginal taxa across all samples. (B) A comparison of shared species between maternal vaginal samples and infant stool samples in 25 dyads (as in Figure 2D, only for the vaginal samples). Bold numbers indicate shared species, in parentheses is noted whether this was a vaginal delivery (V) or C-section after labor (CL). Only one species (*B. breve*) in one family (V26) had enough sequencing coverage in each sample to actually test for strains.

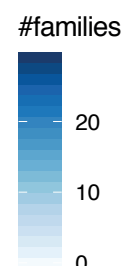



**a**

|                                             | <i>Absent</i><br>(N = 3) | <i>Early-only</i><br>(N = 43) | <i>Persistent</i><br>(N = 23) | P value* |
|---------------------------------------------|--------------------------|-------------------------------|-------------------------------|----------|
| Delivery Mode                               |                          |                               |                               |          |
| Vaginal                                     | 2 (67%)                  | 13 (30%)                      | 21 (91%)                      |          |
| Pre-labor C-section                         | 1 (33%)                  | 15 (35%)                      | 2 (9%)                        | < 0.001  |
| Post-labor C-section                        | 0                        | 15 (35%)                      | 0                             |          |
| Maternal race: White                        | 3 (100%)                 | 35 (81%)                      | 17 (74%)                      |          |
| BMI                                         | 27 ± 6                   | 27 ± 5                        | 27 ± 7                        | 0.93     |
| Chorioamnionitis                            | 0                        | 6 (14%)                       | 4 (17%)                       | 0.71     |
| Maternal antibiotics                        | 2 (67%)                  | 38 (88%)                      | 10 (43%)                      | 0.001    |
| Meconium stained amniotic fluid             | 0                        | 9 (21%)                       | 7 (30%)                       | 0.43     |
| Birthweight                                 | 4243 ± 605               | 3484 ± 479                    | 3592 ± 372                    | 0.35     |
| Infant antibiotics                          | 0                        | 7 (16%)                       | 3 (13%)                       | 0.68     |
| Formula in hospital                         | 2 (67%)                  | 16 (37%)                      | 6 (26%)                       | 0.33     |
| Exclusive breastfeeding at week 2           | 2 (67%)                  | 23 (53%)                      | 14 (61%)                      | 0.79     |
| Duration of 2nd stage (median, IQR)         | 3.75 (n = 1)             | 2.4 (0.75, 4.03)              | 0.5 (0.32, 0.9)               | 0.04     |
| Duration rupture of membranes (median, IQR) | 3.7 (0, 13.45)           | 2.5 (0, 10.37)                | 3.5 (0.8, 15.5)               | 0.29     |

\* statistical comparison made using chi square, ANOVA or Kruskal-Wallis

**b**

|                                             | <i>Absent</i><br>(N = 2) | <i>Early-only</i><br>(N = 13) | <i>Persistent</i><br>(N = 21) | P value |
|---------------------------------------------|--------------------------|-------------------------------|-------------------------------|---------|
| Maternal race: White                        | 2 (100%)                 | 11 (85%)                      | 15 (73%)                      | 0.63    |
| BMI                                         | 25 ± 7                   | 25 ± 3                        | 28 ± 7                        | 0.39*   |
| Chorioamnionitis                            | 0                        | 3 (23%)                       | 4 (19%)                       | 0.74    |
| Maternal antibiotics                        | 1 (50%)                  | 8 (62%)                       | 8 (38%)                       | 0.41    |
| Meconium stained amniotic fluid             | 0                        | 3 (23%)                       | 7 (33%)                       | 0.54    |
| Birthweight                                 | 3968 ± 993               | 3428 ± 367                    | 3548 ± 366                    | 0.19*   |
| Infant antibiotics                          | 1                        | 8 (73%)                       | 8 (36%)                       | 0.12    |
| Formula in hospital                         | 1 (50%)                  | 2 (15%)                       | 5 (24%)                       | 0.53    |
| Exclusive breastfeeding at week 2           | 2 (100%)                 | 8 (62%)                       | 13 (62%)                      | 0.55    |
| Duration of 2nd stage (median, IQR)         | 3.75                     | 1.2 (0.25, 2.32)              | 0.48 (0.32, 0.87)             | 0.43*   |
| Duration rupture of membranes (median, IQR) | 8.58 (3.7, 13.45)        | 8.98 (3.13, 10.23)            | 3.5 (1.08, 15.5)              | 0.22*   |

\*comparison only between Early Only vs. Persistent

**Table S1. Metadata on our 75 dyads cohort. Related to all Figures.** A comparison of demographic and clinical information by *Bacteroides* colonization phenotype in **(a)** all infants and **(b)** only vaginally delivered infants. *Bacteroides* colonization phenotype was characterized as absent (not detected at week 1 or 2), early-only (detected at week 1 only), late (detected at week 2 only) or persistent (detected at both week 1 and week 2). A total of 69 families had data from 16S sequencing for both week 1 and week 2 which allowed this classification. Detection was defined as a relative abundance of 0.1%. Categorical variables were compared between all three groups by chi square. For continuous variables, Early-only and Persistent groups were compared by t-test or Kruskal Wallis.

| Study          | Country        | N (vaginal)        | N (C-section)       | Timing of infant stool samples                           | Sequencing                          | Reference (PMID) |
|----------------|----------------|--------------------|---------------------|----------------------------------------------------------|-------------------------------------|------------------|
| Chu et al      | US (Texas)     | 82                 | 33                  | Delivery & 6 weeks (longitudinal subset)                 | 16S V3-V5 and metagenomics (subset) | 28112736         |
| MUIS           | Holland        | 74                 | 46                  | Delivery, Day 1, Week 1, Week 2, Month 1, 2, 4, 6, 9, 12 | 16S V4                              | 31676793         |
| Ferretti et al | Italy          | 25                 | 0                   | Day 1, Day 3, Day 7, 1 month, 4 months                   | Metagenomics                        | 30001516         |
| Baby Biome     | United Kingdom | 314                | 282                 | Day 4, Day 7, Day 21, Infancy                            | Metagenomics                        | 31534227         |
| Yassour et al  | Finland        | 37                 | 7                   | Birth, 2 weeks, 1, 2 and 3 months                        | Metagenomics                        | 30001517         |
| COPSAC         | Denmark        | ~538*              | ~152*               | 1 week, 1 month, 1 year                                  | 16S V4                              | 29321519         |
| INFANTMET      | Ireland        | 83 term, 4 preterm | 70 term, 35 preterm | Week 1, Week 4, Week 8, Week 24                          | 16S V4-V5                           | 28095889         |

\*Estimated from total N and the percent delivered via C-section in parent manuscript, as exact numbers are not reported

**Table S3:** Validation cohorts information. Related to Figure S1B. Description of the cohorts included in the validation analysis on *Bacteroides* persistence.
